# Supplementary material for: Treatment monitoring in metastatic colorectal cancer patients by quantification and KRAS genotyping of circulating cell-free DNA
Source: PubMed Central journal article supplement (PMC5362218; doi:10.1371/journal.pone.0174308), 2017-03-22
Supplement: pone.0174308.s003.pdf [file pone.0174308.s003.pdf]

| ID | Sex | Age (years) | Primary tumor | Primary tumor resected | Metastases |                     | Stage   | Chemotherapeutic regimen |                |            |
|----|-----|-------------|---------------|------------------------|------------|---------------------|---------|--------------------------|----------------|------------|
|    |     |             |               |                        | Sites      | Localization        |         | Therapy line             | Chemo-therapy  | Biological |
| 1  | m   | 79          | rectum        | yes                    | 1          | HEP                 | UICC IV | 1st                      | Iri/5-FU/LV    | BV         |
|    |     |             |               |                        |            |                     |         | 2nd                      | Ox/5-FU/LV     | BV         |
| 2  | m   | 57          | rectum        | yes                    | 2          | HEP, PUL            | UICC IV | 2nd                      | Iri/5-FU/LV    | Afl        |
| 3  | f   | 53          | right         | no                     | 2          | HEP, LYM            | UICC IV | 1st                      | Iri/5-FU/LV    | Cet        |
| 4  | f   | 80          | right         | yes                    | >2         | HEP, PUL, LYM       | UICC IV | 1st                      | 5FU/LV         | BV         |
| 5  | m   | 59          | rectum        | yes                    | 1          | HEP                 | UICC IV | 2nd                      | Ox/5-FU/LV     | -          |
| 6  | m   | 70          | rectum        | yes                    | 2          | PUL, PLEU           | UICC IV | 1st                      | Iri/5-FU/LV    | BV         |
| 7  | m   | 78          | right         | yes                    | 2          | HEP, PUL            | UICC IV | 3rd                      | Ox/5-FU/LV     | BV         |
| 8  | m   | 75          | left          | yes                    | 1          | HEP                 | UICC IV | 1st                      | Iri/5-FU/LV    | Cet        |
| 9  | m   | 78          | right         | yes                    | >2         | HEP, PUL, PLEU, LYM | UICC IV | 1st                      | 5FU/LV         | BV         |
| 10 | m   | 57          | left          | yes                    | >2         | HEP, PUL, OSS       | UICC IV | 2nd                      | Ox/5-FU/LV     | BV         |
| 11 | m   | 57          | left          | yes                    | 2          | HEP, LYM            | UICC IV | 1st                      | Iri/5-FU/LV    | Pan        |
| 12 | m   | 67          | rectum        | yes                    | 2          | LYM, PUL            | UICC IV | 1st                      | Iri/5-FU/LV    | BV         |
| 13 | m   | 75          | right         | yes                    | >2         | HEP, PUL, LYM, SKI  | UICC IV | 2nd                      | Ox/5-FU/LV     | BV         |
| 14 | m   | 69          | left          | yes                    | 2          | HEP, PER            | UICC IV | 1st                      | Iri/5-FU/LV    | Cet        |
|    |     |             |               |                        |            |                     |         | 2nd                      | Ox/5-FU/LV     | -          |
|    |     |             |               |                        |            |                     |         | 3rd                      | Iri            | Pan        |
| 15 | m   | 61          | rectum        | no                     | 2          | HEP, PUL            | UICC IV | 2nd                      | Ox/5-FU/LV     | BV         |
| 16 | m   | 62          | left          | no                     | >2         | ADR, HEP, LYM, PUL  | UICC IV | 1st                      | Ox/Iri/5-FU/LV | -          |
|    |     |             |               |                        |            |                     |         | 2nd                      | Iri/5-FU/LV    | BV         |
| 17 | m   | 70          | right         | yes                    | 2          | HEP, PUL            | UICC IV | 2nd                      | Cap            | BV         |
| 18 | m   | 60          | rectum        | yes                    | >2         | HEP, LYM, SKI       | UICC IV | 2nd                      | Ox/5-FU/LV     | -          |
| 19 | m   | 58          | left          | no                     | >2         | HEP, PUL, LYM       | UICC IV | 4th                      | -              | Pan        |
| 20 | m   | 71          | rectum        | yes                    | 1          | LYM                 | UICC IV | 1st                      | Iri/5-FU/LV    | BV         |
|    |     |             |               |                        |            |                     |         | 2nd                      | Ox/5-FU/LV     | -          |
| 21 | m   | 73          | right         | yes                    | >2         | HEP, PUL, LYM       | UICC IV | 2nd                      | Ox/5-FU/LV     | BV         |
| 22 | f   | 68          | left          | yes                    | >2         | HEP, PUL, PER       | UICC IV | 3rd                      | Reg            | -          |
| 23 | m   | 61          | rectum        | yes                    | >2         | HEP, LYM, PUL       | UICC IV | 1st                      | Iri/5-FU/LV    | Cet        |
| 24 | m   | 53          | right         | yes                    | 2          | HEP, LYM            | UICC IV | 1st                      | Iri/5-FU/LV    | BV         |
| 25 | m   | 63          | rectum        | yes                    | 1          | LYM                 | UICC IV | 1st                      | Iri            | -          |
| 26 | f   | 45          | left          | yes                    | 2          | HEP, PER            | UICC IV | 2nd                      | Iri            | Pan        |
| 27 | m   | 66          | left          | yes                    | 2          | HEP, LYM            | UICC IV | 1st                      | Cap            | BV         |

Ox=Oxaliplatin, Iri=Irinotecan, BV=Bevacizumab, Cet=Cetuximab, Pan=Panitumumab, Reg=Regorafenib, Cap=Capecitabine, Afl=Aflibercept, LV=Leucovorin, 5-FU=5-Fluorouracil, UICC=union international contre le cancer
