# Supplementary material for: Treatment monitoring in metastatic colorectal cancer patients by quantification and KRAS genotyping of circulating cell-free DNA
Source: PubMed Central journal article supplement (PMC5362218; doi:10.1371/journal.pone.0174308), 2017-03-22
Supplement: pone.0174308.s004.pdf [file pone.0174308.s004.pdf]

| ID | Sex | Age (years) | cfDNA (ng/ml) |
|----|-----|-------------|---------------|
| 1  | m   | 28          | 4,675         |
| 2  | f   | 32          | 4,575         |
| 3  | m   | 37          | 3,2           |
| 4  | f   | 62          | 3,5           |
| 5  | m   | 63          | 4,175         |
| 6  | f   | 25          | 2,525         |
| 7  | f   | 24          | 2,2175        |
| 8  | m   | 27          | 2,675         |
| 9  | m   | 30          | 2,95          |
| 10 | f   | 30          | 6,75          |
| 11 | f   | 31          | 6,5           |
| 12 | m   | 29          | 4,65          |
| 13 | f   | 28          | 7,8           |
| 14 | m   | 41          | 16,8          |
| 15 | f   | 27          | 6,55          |
| 16 | f   | 32          | 4,3           |
| 17 | m   | 34          | 4,225         |
| 18 | m   | 78          | 2,44          |
| 19 | m   | 68          | 2,7           |
| 20 | m   | 40          | 0,58          |
| 21 | m   | 60          | 3,5375        |
| 22 | f   | 62          | 0,351         |
| 23 | m   | 50          | 9,6           |
| 24 | m   | 70          | 1,95          |
| 25 | f   | 66          | 1,98          |
| 26 | f   | 72          | 1,97          |
| 27 | f   | 63          | 3,55          |
| 28 | f   | 65          | 1,77          |
| 29 | f   | 62          | 0,76          |
| 30 | f   | 73          | 0,8425        |
| 31 | m   | 69          | 1,04          |
| 32 | f   | 63          | 1,0325        |
| 33 | f   | 68          | 0,9           |
| 34 | f   | 58          | 0,66          |
| 35 | m   | 67          | 0,93          |
| 36 | m   | 64          | 0,99          |
| 37 | f   | 77          | 2,27          |
| 38 | m   | 67          | 1,26          |
