# Supplementary material for: Treatment monitoring in metastatic colorectal cancer patients by quantification and KRAS genotyping of circulating cell-free DNA
Source: PubMed Central journal article supplement (PMC5362218; doi:10.1371/journal.pone.0174308), 2017-03-22
Supplement: pone.0174308.s005.pdf [file pone.0174308.s005.pdf]

| ID | Sex | Age (years) | Primary tumor | Primary tumor resected | Metastases |                    | Stage   | Tissue KRAS-status | cfDNA KRAS-status |
|----|-----|-------------|---------------|------------------------|------------|--------------------|---------|--------------------|-------------------|
|    |     |             |               |                        | Sites      | Localization       |         |                    |                   |
| 28 | f   | 60          | left+rectum   | yes                    | >2         | HEP, LYM, PUL      | UICC IV | G13D               | codon 12/13       |
| 29 | m   | 52          | rectum        | yes                    | >2         | HEP, LYM, PUL      | UICC IV | G12R               | wt                |
| 30 | m   | 59          | right         | yes                    | 1          | HEP                | UICC IV | G12C               | wt                |
| 31 | m   | 80          | left          | yes                    | 1          | HEP                | UICC IV | G12V               | codon 12/13       |
| 32 | m   | 33          | right         | yes                    | 1          | HEP                | UICC IV | G12V               | codon 12/13       |
| 33 | f   | 61          | left          | yes                    | 1          | PER                | UICC IV | G13D               | codon 12/13       |
| 34 | m   | 65          | rectum        | yes                    | >2         | HEP, LYM, PUL      | UICC IV | G13D               | codon 12/13       |
| 35 | m   | 79          | rectum        | yes                    | >2         | LYM, OSS, PUL      | UICC IV | G13D               | codon 12/13       |
| 36 | m   | 43          | right         | yes                    | >2         | HEP, LYM, PUL      | UICC IV | G12S               | codon 12/13       |
| 37 | m   | 51          | rectum        | yes                    | 2          | LYM, PUL           | UICC IV | G13D               | codon 12/13       |
| 38 | m   | 68          | rectum        | yes                    | 1          | HEP                | UICC IV | G12A               | codon 12/13       |
| 39 | m   | 69          | rectum        | yes                    | >2         | HEP, LYM, OSS, PUL | UICC IV | G12V               | codon 12/13       |
| 41 | m   | 80          | rectum        | yes                    | 1          | PUL                | UICC IV | G13D               | wt                |
| 42 | f   | 57          | rectum        | yes                    | >2         | BRA, OTH, PUL      | UICC IV | A146T              | A146T             |
| 43 | m   | 72          | left          | yes                    | >2         | OTH, PER, PUL      | UICC IV | G12G               | wt                |
| 44 | f   | 79          | right         | yes                    | >2         | LYM, PER, SPL      | UICC IV | G12S               | codon 12/13       |
| 45 | f   | 58          | right         | yes                    | 2          | HEP, LYM           | UICC IV | G12S               | wt                |
| 46 | f   | 73          | right         | no                     | 1          | HEP                | UICC IV | G12R               | codon 12/13       |
| 47 | m   | 79          | right         | yes                    | 1          | HEP                | UICC IV | G12D               | codon 12/13       |
| 48 | m   | 64          | rectum        | no                     | >2         | HEP, LYM, PUL      | UICC IV | G12D               | codon 12/13       |
| 49 | f   | 70          | left+right    | yes                    | >2         | HEP, LYM, PER      | UICC IV | G12C               | codon 12/13       |
| 50 | m   | 58          | left          | yes                    | >2         | HEP, OSS, SPL      | UICC IV | G12V               | codon 12/13       |
| 51 | m   | 53          | right         | yes                    | 1          | HEP                | UICC IV | Q61R               | Q61R              |

UICC=union international contre le cancer, wt=wild-type for tested hot-spots
