# Supplementary material for: Treatment monitoring in metastatic colorectal cancer patients by quantification and KRAS genotyping of circulating cell-free DNA
Source: PubMed Central journal article supplement (PMC5362218; doi:10.1371/journal.pone.0174308), 2017-03-22
Supplement: pone.0174308.s006.pdf [file pone.0174308.s006.pdf]

| ID | Tissue<br>KRAS-status<br>(initial<br>diagnosis) | cfDNA<br>KRAS-status<br>(baseline) | Therapy<br>line | KRAS mutated allele frequency (%) |                   |             |
|----|-------------------------------------------------|------------------------------------|-----------------|-----------------------------------|-------------------|-------------|
|    |                                                 |                                    |                 | baseline                          | upon<br>treatment | progression |
| 1  | wt                                              | wt                                 | 1st             | 0                                 | 0                 | 0           |
|    |                                                 |                                    | 2nd             | 0                                 | 0                 | 0           |
| 2  | wt                                              | wt                                 | 2nd             | 0                                 | 0                 | 0           |
| 3  | wt                                              | wt                                 | 1st             | 0                                 | 0                 | 0           |
| 4  | wt                                              | wt                                 | 1st             | 0                                 | 0                 | 0           |
| 5  | wt                                              | wt                                 | 2nd             | 0                                 | 0                 | 0           |
| 6  | G13D                                            | wt                                 | 1st             | 0                                 | 0                 | 0           |
| 7  | G12R                                            | codon 12/13                        | 3rd             | 66.2                              | 53.3              | 64.8        |
| 8  | wt                                              | wt                                 | 1st             | 0                                 | 0                 | 0           |
| 9  | A146T                                           | A146T                              | 1st             | 44.7                              | 25.0              | 44.4        |
| 10 | wt                                              | wt                                 | 2nd             | 0                                 | 0                 | 0           |
| 11 | wt                                              | Q61H                               | 1st             | 13.5                              | 0                 | 11.3        |
| 12 | wt                                              | wt                                 | 1st             | 0                                 | 0                 | 0           |
| 13 | wt                                              | codon 12/13                        | 2nd             | 11.5                              | 4.3               | 3.6         |
| 14 | wt                                              | wt                                 | 1st             | 0                                 | 0                 | 0           |
|    |                                                 |                                    | 2nd             | 0                                 | 0                 | 0           |
|    |                                                 |                                    | 3rd             | 0                                 | 0                 | 0           |
| 15 | wt                                              | wt                                 | 2nd             | 0                                 | 0                 | 0           |
| 16 | G12D                                            | codon 12/13                        | 1st             | 9.8                               | 12.4              | 22.7        |
|    |                                                 |                                    | 2nd             | 33.9                              | 17.5              | 44.0        |
| 17 | wt                                              | wt                                 | 2nd             | 0                                 | 0                 | 0           |
| 18 | codon 12                                        | codon 12/13                        | 2nd             | 10.0                              | 12.4              | 28.4        |
| 19 | wt                                              | Q61H                               | 4th             | 0.7                               | 0.5               | 0.5         |
| 20 | wt                                              | wt                                 | 1st             | 0                                 | 0                 | 0           |
|    |                                                 |                                    | 2nd             | 0                                 | 0                 | 0           |
| 21 | G12D                                            | codon 12/13                        | 2nd             | 14.8                              | 12.8              | 24.4        |
| 22 | G12D                                            | codon 12/13                        | 3rd             | 0.3                               | 0.1               | 0.8         |
| 23 | wt                                              | wt                                 | 1st             | 0                                 | 0                 | 0           |
| 24 | G12R                                            | codon 12/13                        | 1st             | 31.1                              | 3.8               | 7.4         |
| 25 | G12D                                            | codon 12/13                        | 1st             | 9.6                               | 33.3              | 0.3         |
| 26 | wt                                              | wt                                 | 2nd             | 0                                 | 0                 | 0           |
| 27 | G12V                                            | codon 12/13                        | 1st             | 3.1                               | 0.3               | 2.2         |

wt=wild-type for tested hot-spots
